# Supplementary material for: Applying Adult Learning Best Practices to Design Immunization Training for Health Care Workers in Ghana
Source: PubMed Central journal article supplement (PMC8514033; doi:10.9745/ghsp-d-21-00090), 2021-09-30
Supplement: 21-00090-Traicoff-Supplement.pdf [file 21-00090-Traicoff-Supplement.pdf]

# Ghana 2YL TOT Workshop

## Detailed Session Plan: Training the Trainers

### Session Objectives

It is expected that after these sessions, participants will be able to:

- Develop a customized training plan
- Demonstrate the ability to teach a lesson for 2YL
- Complete the competency tool, either using paper based and mobile app

### Learning Objectives

- Describe the characteristics of adult learners
- Use techniques in the classroom to encourage interactivity and learning
- Prepare a personal development plan to improve as an instructor
- Describe the roles and responsibilities for implementing 2YL training
- Select strategies for changing training activity type for specific training needs
- Complete a baseline assessment using the competency tool

| <b>Materials Needed</b>                                                                                                                                                                                   |
|-----------------------------------------------------------------------------------------------------------------------------------------------------------------------------------------------------------|
| Topic signup sheet<br>Trainer instructions<br>Individual development plans<br>Challenging participants handout<br>Participants version of 2YL lesson plan<br>Classroom supplies<br>Trainer feedback forms |

| <b>Key Prerequisite Knowledge</b> |
|-----------------------------------|
| Technical knowledge               |

| <b>Lesson</b>   | <b>Key Points/Content</b>                                                    | <b>Day/Time</b> | <b>Instructional Activity/Source Materials</b>               |
|-----------------|------------------------------------------------------------------------------|-----------------|--------------------------------------------------------------|
| Introduction    | Expectations of workshop                                                     | Day 1/5 min     | As part of Welcome during Session 1<br>Post TOT Signup sheet |
| Training Adults | Intro to adult learning                                                      | 20 min          | ppt                                                          |
| Exercise        | Exercise 1: Dos & Don'ts                                                     | 30 min          | 1. Flip chart<br>2. Sticky notes                             |
| Daily Review    | Review day from trainer's point of view: point out key lessons, trainer tips | 15 min          | Show example of session outlines                             |
| Training Adults | Training delivery good practices                                             | Day 2/30 min    | ppt                                                          |
| Exercise        | Exercise 2: Manage the classroom                                             | 25 min          | 1. Handling challenging situations handout<br>2. Scenarios   |

| <b>Lesson</b>                 | <b>Key Points/Content</b>                                                                                                                        | <b>Day/Time</b> | <b>Instructional Activity/Source Materials</b>                                                                                                                                                                                                                                   |
|-------------------------------|--------------------------------------------------------------------------------------------------------------------------------------------------|-----------------|----------------------------------------------------------------------------------------------------------------------------------------------------------------------------------------------------------------------------------------------------------------------------------|
|                               | Next steps                                                                                                                                       | 5 min           |                                                                                                                                                                                                                                                                                  |
| Sign up for Teachback         | Form pairs & choose a topic from the list                                                                                                        | 5 min           | Sign up during lunch on Day 2<br>Distribute preparation instructions                                                                                                                                                                                                             |
| Daily Review                  | Review day from trainer's point of view: point out key lessons, trainer tips                                                                     | 15 min          |                                                                                                                                                                                                                                                                                  |
| Planning training activities  | Role of trainers<br>5 moments of need                                                                                                            | Day 3/20<br>min | Ppt/discussion                                                                                                                                                                                                                                                                   |
| Exercise                      | Exercise 1: Assess the level of risk                                                                                                             | 10 min          |                                                                                                                                                                                                                                                                                  |
| Selecting training activities | Learning strategies                                                                                                                              | 15 min          | Ppt/discussion                                                                                                                                                                                                                                                                   |
| Daily Review                  | Review day from trainer's point of view: point out key lessons, trainer tips<br>Include guidance for facilitating a Process Improvement workshop | 15 min          |                                                                                                                                                                                                                                                                                  |
| Developing training plans     | Workshop: develop preliminary plans<br>Present plans                                                                                             | Day 4/2.25 hrs  |                                                                                                                                                                                                                                                                                  |
| M&E tools                     | Explain M&E tools & process                                                                                                                      | 45 min          | Demonstration/discussion                                                                                                                                                                                                                                                         |
| Teachback                     | Prepare teachback sessions                                                                                                                       | 1 hr            |                                                                                                                                                                                                                                                                                  |
| Teachback                     | Begin: Teach sample lessons                                                                                                                      | 1 hr            | <ol style="list-style-type: none"> <li>1. Teams of 2 teach for maximum 20 minutes, with other participants acting as 'students'</li> <li>2. Faculty completes feedback forms</li> <li>3. Other participants provide feedback using informal method (to be determined)</li> </ol> |
| Daily Review                  | Review day from trainer's point of view: point out key lessons, trainer tips                                                                     | 15 min          |                                                                                                                                                                                                                                                                                  |

| Lesson            | Key Points/Content                                               | Day/Time         | Instructional Activity/Source Materials                                                                                                                                                                                                                                          |
|-------------------|------------------------------------------------------------------|------------------|----------------------------------------------------------------------------------------------------------------------------------------------------------------------------------------------------------------------------------------------------------------------------------|
|                   | Include guidance for facilitating a Process Improvement workshop |                  |                                                                                                                                                                                                                                                                                  |
| Teachback         | Complete: Teach sample lessons                                   | Day 5/4.5 hrs    | <ol style="list-style-type: none"> <li>4. Teams of 2 teach for maximum 20 minutes, with other participants acting as 'students'</li> <li>5. Faculty completes feedback forms</li> <li>6. Other participants provide feedback using informal method (to be determined)</li> </ol> |
| Teachback         | Teachback debrief                                                | 30 min           | Discuss the experience & next steps                                                                                                                                                                                                                                              |
| <b>Total Time</b> |                                                                  | <b>13.75 hrs</b> |                                                                                                                                                                                                                                                                                  |
|                   |                                                                  |                  |                                                                                                                                                                                                                                                                                  |

# Ghana 2YL TOT

## Teachback Instructions

To help you prepare for the teachback session, please review this instruction sheet.

1. By now you should have met with your teammate and selected a topic from the list.
2. Decide which teammate will be lead instructor for this session. The other teammate will be the co-trainer. You may divide responsibilities as you wish.
3. Prepare a short (15 minutes) lesson on the topic using the following guidelines:
  - a. Use the Ghana 2YL materials to help you prepare your lesson.
  - b. Be sure to include instruction of content and an exercise to support the content.
  - c. If you wish, you may also include a ‘workshop’ introduction, icebreaker, energizer or assessment. Any of these activities must fit in the 15 minute time frame.
  - d. Use the principles of adult learning, course materials, textbooks, and any materials you brought with you.
  - e. Prepare handouts as possible.

### **Tips for a positive teachback experience**

1. RELAX!! No one expects you to be an expert at the subject matter. Remember the purpose of this activity is to allow you to practice your new skills in a friendly environment where you can receive constructive feedback.
2. As others train, you will be a ‘student’ in their class. This is excellent time to remember the Golden Rule (“Do unto others as you would have them do unto you”). Feel free to role play a ‘typical’ student, but remain positive and supportive of your classmate.
3. You will have the opportunity to provide feedback to each other.

## Teachback Feedback Form Ghana 2YL

Topic : \_\_\_\_\_

Co-Instructor: \_\_\_\_\_ Co-Instructor: \_\_\_\_\_

|                       |                                   | Check One |      |      | Constructive Comments |
|-----------------------|-----------------------------------|-----------|------|------|-----------------------|
|                       |                                   | Excellent | Good | Fair |                       |
| <b>Subject Matter</b> | Showed understanding of content   |           |      |      |                       |
|                       | Was able to answer questions      |           |      |      |                       |
|                       | Included key points               |           |      |      |                       |
| <b>Adult Learning</b> | Used multiple delivery methods    |           |      |      |                       |
|                       | Encouraged participation          |           |      |      |                       |
|                       | Used exercise to support learning |           |      |      |                       |
| <b>Delivery</b>       | Used clear learning objectives    |           |      |      |                       |
|                       | Began with a strong opening       |           |      |      |                       |
|                       | Managed time well                 |           |      |      |                       |
|                       | Appeared confident                |           |      |      |                       |
| <b>Materials</b>      | Organized lesson in logical order |           |      |      |                       |
|                       | Used visual aids effectively      |           |      |      |                       |

**Comments:**

**I liked:**

---



---

**I wish:**

---



---

*Use the other side of this form for additional comments*

**GHANA 2YL CONFIDENT INSTRUCTOR**  
**Personal Development Plan**

**My Most Important Do's and Don'ts**

|  |
|--|
|  |
|  |
|  |

| Are you worried about:       | Then try:                              | Check the items you want to work on |
|------------------------------|----------------------------------------|-------------------------------------|
| Fear                         | Be well prepared                       |                                     |
|                              | Use ice breakers                       |                                     |
|                              | Acknowledge the fear (to yourself!)    |                                     |
| Credibility                  | Don't apologize                        |                                     |
|                              | Have an attitude of an expert          |                                     |
|                              | Share personal background              |                                     |
| Personal Experiences         | Report personal experiences            |                                     |
|                              | Report experiences of others           |                                     |
|                              | Use analogies, movies or famous people |                                     |
| Difficult Learners           | Confront problem learner               |                                     |
|                              | Circumvent dominating behavior         |                                     |
|                              | Use small groups for timid behavior    |                                     |
| Participation                | Ask open-ended questions               |                                     |
|                              | Plan small group activities            |                                     |
|                              | Invite participation                   |                                     |
| Timing                       | Plan well                              |                                     |
|                              | Practice, practice, practice           |                                     |
|                              | Allow time for questions               |                                     |
| Adjust Instruction           | Know group needs                       |                                     |
|                              | Request feedback                       |                                     |
|                              | Redesign during breaks                 |                                     |
| Questions                    | Anticipate questions                   |                                     |
|                              | Paraphrase learners' questions         |                                     |
|                              | Admit if you don't know                |                                     |
| Feedback                     | Solicit informal feedback              |                                     |
|                              | Evaluate the class                     |                                     |
|                              | Observe other instructors              |                                     |
| Media, Materials, Facilities | Know the equipment                     |                                     |
|                              | Have materials ready                   |                                     |
|                              | Have a back-up plan                    |                                     |
| Openings & Closings          | Develop an 'openings' file             |                                     |
|                              | Relax the students                     |                                     |
|                              | Summarize concisely                    |                                     |
| Dependence on Notes          | Use cards                              |                                     |
|                              | Use visuals                            |                                     |
|                              | Practice                               |                                     |

## Ghana 2YL Workshop Conclusion Session & Follow Up

| Materials Needed                                                  |
|-------------------------------------------------------------------|
| Flip Chart<br>Markers<br>Health worker workshop evaluation survey |

| Outline              | Content                                                                                                                                                                                                                                                                                                                                                                                                                           | Time              | Instructional Activity                                                                                                                                                                                                                                                                                                                                   |
|----------------------|-----------------------------------------------------------------------------------------------------------------------------------------------------------------------------------------------------------------------------------------------------------------------------------------------------------------------------------------------------------------------------------------------------------------------------------|-------------------|----------------------------------------------------------------------------------------------------------------------------------------------------------------------------------------------------------------------------------------------------------------------------------------------------------------------------------------------------------|
| Workshop Review      | Summarize the workshop                                                                                                                                                                                                                                                                                                                                                                                                            | 10 minutes        | Instruct teams to work in their groups to develop their "Top 10" list: List the 10 lessons that they found most useful.                                                                                                                                                                                                                                  |
|                      | Activity Debrief                                                                                                                                                                                                                                                                                                                                                                                                                  | 10 minutes        | Have teams report their Top 10 list. Lead brief discussions as appropriate.                                                                                                                                                                                                                                                                              |
| Workshop Survey      |                                                                                                                                                                                                                                                                                                                                                                                                                                   |                   | <ol style="list-style-type: none"> <li>1. Distribute 1 page survey. Instruct participants to use the back of the survey to add comments or suggestions for improvement.</li> <li>2. While participants are completing the survey, take photos of the flip charts or record the teams' Top 10 lists.</li> <li>3. Collect the evaluation forms.</li> </ol> |
| Closing Remarks      |                                                                                                                                                                                                                                                                                                                                                                                                                                   | 5 minutes         | Thank the participants for their participation.<br><br>Remind them of available resources.                                                                                                                                                                                                                                                               |
| <b>Total Time</b>    |                                                                                                                                                                                                                                                                                                                                                                                                                                   | <b>30 minutes</b> |                                                                                                                                                                                                                                                                                                                                                          |
|                      |                                                                                                                                                                                                                                                                                                                                                                                                                                   |                   |                                                                                                                                                                                                                                                                                                                                                          |
| <b>POST WORKSHOP</b> | <ol style="list-style-type: none"> <li>1. Summarize the evaluation survey responses within 1 week of the training. Include all comments.</li> <li>2. Use the taxonomy below to assess the success of the workshop.</li> <li>3. Summarize the Top 10 lists to develop a list of most useful lessons.</li> <li>4. Submit the evaluation summary &amp; most useful lessons to <b>XXXX within 1 month of the training.</b></li> </ol> |                   |                                                                                                                                                                                                                                                                                                                                                          |

**Ghana 2YL Health Worker and Supervisor Workshop**  
Suggested Ranking Standards

|                                                                                                                                                                   |                                                                                                        |                       |
|-------------------------------------------------------------------------------------------------------------------------------------------------------------------|--------------------------------------------------------------------------------------------------------|-----------------------|
| 1. Check the <b>one best answer</b> that best describes what the workshop enabled you to do, if anything.                                                         |                                                                                                        |                       |
|                                                                                                                                                                   | A. It DID NOT enable me to UNDERSTAND NEW CONCEPTS or USE NEW SKILLS.                                  | Unacceptable          |
|                                                                                                                                                                   | B. It enabled me to UNDERSTAND SOME NEW CONCEPTS, but did NOT PREPARE ME TO USE NEW SKILLS on the job. | Unacceptable          |
|                                                                                                                                                                   | C. It enabled me to BEGIN TRYING NEW SKILLS on the job.                                                | Acceptable            |
|                                                                                                                                                                   | D. It enabled me to CONFIDENTLY USE NEW SKILLS on the job.                                             | Superior              |
|                                                                                                                                                                   | E. It enabled me to BE THOROUGHLY CONFIDENT AND PRACTICED IN USING NEW SKILLS on the job.              | Superior/<br>Unlikely |
| 2. In regard to the concepts taught in the workshop, how motivated WILL YOU BE to USE these skills in your work?<br><b>Check the one best answer.</b>             |                                                                                                        |                       |
|                                                                                                                                                                   | A. I WILL NOT MAKE THIS A PRIORITY when I get back to my job.                                          | Unacceptable          |
|                                                                                                                                                                   | B. I will make this a PRIORITY-BUT A LOW PRIORITY-when I get back to my job.                           | Unacceptable          |
|                                                                                                                                                                   | C. I will make this a MODERATE PRIORITY when I get back to my job.                                     | Acceptable            |
|                                                                                                                                                                   | D. I will make this a HIGH PRIORITY when I get back to my job.                                         | Acceptable            |
|                                                                                                                                                                   | E. I will make this one of my HIGHEST PRIORITIES when I get back to my job                             | Superior              |
| 3. Which of the following were true about the opportunities you were given to practice? <b>Check all that apply.</b>                                              |                                                                                                        |                       |
|                                                                                                                                                                   | A. I was given ALMOST NO PRACTICE.                                                                     | Unacceptable          |
|                                                                                                                                                                   | B. I was given INADEQUATE AMOUNTS OF PRACTICE.                                                         | Unacceptable          |
|                                                                                                                                                                   | C. I was given TOO MUCH PRACTICE.                                                                      | Red Flag              |
|                                                                                                                                                                   | D. I DID NOT GET ENOUGH HELPFUL FEEDBACK WHEN WE WERE PRACTICING.                                      | Unacceptable          |
|                                                                                                                                                                   | E. I was OFTEN ASKED TO PRACTICE SOMETHING RIGHT AFTER WE LEARNED IT.                                  | Acceptable            |
|                                                                                                                                                                   | F. I generally RECEIVED SUFFICIENT AND HELPFUL FEEDBACK AFTER WE PRACTICED A TASK.                     | Acceptable            |
| 4. Which of the following were true about your instructor? <b>Check all that apply.</b>                                                                           |                                                                                                        |                       |
|                                                                                                                                                                   | A. Was OFTEN UNCLEAR or DISORGANIZED                                                                   | Unacceptable          |
|                                                                                                                                                                   | B. Exhibited UNACCEPTABLE LACK OF KNOWLEDGE.                                                           | Unacceptable          |
|                                                                                                                                                                   | C. Exhibited LACK OF REAL-WORLD EXPERIENCE.                                                            | Unacceptable          |
|                                                                                                                                                                   | D. Generally PERFORMED COMPETENTLY AS A TRAINER.                                                       | Acceptable            |
|                                                                                                                                                                   | E. Showed DEEP SUBJECT-MATTER KNOWLEDGE.                                                               | Superior              |
|                                                                                                                                                                   | F. Demonstrated HIGH LEVELS OF REAL-WORLD EXPERIENCE.                                                  | Acceptable            |
|                                                                                                                                                                   | G. MOTIVATED ME TO ENGAGE ACTIVELY IN THE LEARNING.                                                    | Acceptable            |
|                                                                                                                                                                   | H. Is a person I CAME TO TRUST.                                                                        | Superior              |
| 5. From your perspective, how valuable are the concepts taught in the workshop? HOW MUCH WILL THEY HELP YOU IMPROVE YOUR MEASLES-RUBELLA/MEN A COVERAGE OUTCOMES? |                                                                                                        |                       |
|                                                                                                                                                                   | A. Will NOT HELP ME to improve my outcomes.                                                            | Unacceptable          |
|                                                                                                                                                                   | B. Will HELP ME SLIGHTLY to improve my work outcomes.                                                  | Unacceptable          |
|                                                                                                                                                                   | C. Will HELP ME TO A MODERATE AMOUNT to improve my work outcomes.                                      | Acceptable            |
|                                                                                                                                                                   | D. Will HELP ME SIGNIFICANTLY to improve my work outcomes.                                             | Superior              |
|                                                                                                                                                                   | E. Concepts taught ARE NOT RELEVANT to my work.                                                        | Red Flag              |



## Sample Evaluation Summary Report

The following pages display an example of a summary report. You can use this as your template. Be sure to include the number of participants (N=X)

### Evaluation Report Template for X location. Workshop Date:

II End of workshop activity: Most useful lessons

Working in their teams, participants were asked to list their top 10 lessons, based on expected usefulness. There were 5 groups.

Detailed results are listed below:

| Lesson/Key Word            | Number of times mentioned |
|----------------------------|---------------------------|
| <i>List responses here</i> |                           |
|                            |                           |
|                            |                           |
|                            |                           |
|                            |                           |
|                            |                           |
|                            |                           |

## II End of workshop survey summary

N=XX

|                                                                                                                                                     |                                                                                                     |                                 | Responses |
|-----------------------------------------------------------------------------------------------------------------------------------------------------|-----------------------------------------------------------------------------------------------------|---------------------------------|-----------|
| 1. In regard to the topics taught, select the answer that best describes what the workshop enabled you to do, if anything.                          |                                                                                                     |                                 |           |
| A.                                                                                                                                                  | It DID NOT enable me to UNDERSTAND NEW CONCEPTS or USE NEW SKILLS.                                  | Unacceptable                    |           |
| B.                                                                                                                                                  | It enabled me to UNDERSTAND SOME NEW CONCEPTS, but did NOT PREPARE ME TO USE NEW SKILLS on the job. | Unacceptable                    |           |
| C.                                                                                                                                                  | It enabled me to BEGIN TRYING NEW SKILLS on the job.                                                | Acceptable                      |           |
| D.                                                                                                                                                  | It enabled me to CONFIDENTLY USE NEW SKILLS on the job.                                             | Superior                        |           |
| E.                                                                                                                                                  | It enabled me to BE THOROUGHLY CONFIDENT AND PRACTICED IN USING NEW SKILLS on the job.              | Superior/<br>Unlikely<br>result |           |
| 2. In regard to the concepts taught in the workshop, how motivated WILL YOU BE to USE these skills in your work?                                    |                                                                                                     |                                 |           |
| A.                                                                                                                                                  | I WILL NOT MAKE THIS A PRIORITY when I get back to my job.                                          | Unacceptable                    |           |
| B.                                                                                                                                                  | I will make this a PRIORITY-BUT A LOW PRIORITY-when I get back to my job.                           | Unacceptable                    |           |
| C.                                                                                                                                                  | I will make this a MODERATE PRIORITY when I get back to my job.                                     | Acceptable                      |           |
| D.                                                                                                                                                  | I will make this a HIGH PRIORITY when I get back to my job.                                         | Acceptable                      |           |
| E.                                                                                                                                                  | I will make this one of my HIGHEST PRIORITIES when I get back to my job                             | Superior                        |           |
| 3. Which of the following were true about the opportunities you were given to practice?                                                             |                                                                                                     |                                 |           |
| A.                                                                                                                                                  | I was given ALMOST NO PRACTICE.                                                                     | Unacceptable                    |           |
| B.                                                                                                                                                  | I was given INADEQUATE AMOUNTS OF PRACTICE.                                                         | Unacceptable                    |           |
| C.                                                                                                                                                  | I was given TOO MUCH PRACTICE.                                                                      | Red Flag                        |           |
| D.                                                                                                                                                  | I DID NOT GET ENOUGH HELPFUL FEEDBACK WHEN WE WERE PRACTICING.                                      | Unacceptable                    |           |
| E.                                                                                                                                                  | I was OFTEN ASKED TO PRACTICE SOMETHING RIGHT AFTER WE LEARNED IT.                                  | Acceptable                      |           |
| F.                                                                                                                                                  | I generally RECEIVED SUFFICIENT AND HELPFUL FEEDBACK AFTER WE PRACTICED A TASK.                     | Acceptable                      |           |
| 4. Which of the following were true about your instructor?                                                                                          |                                                                                                     |                                 |           |
| A.                                                                                                                                                  | Was OFTEN UNCLEAR or DISORGANIZED                                                                   | Unacceptable                    |           |
| B.                                                                                                                                                  | Exhibited UNACCEPTABLE LACK OF KNOWLEDGE.                                                           | Unacceptable                    |           |
| C.                                                                                                                                                  | Exhibited LACK OF REAL-WORLD EXPERIENCE.                                                            | Unacceptable                    |           |
| D.                                                                                                                                                  | Generally PERFORMED COMPETENTLY AS A TRAINER.                                                       | Acceptable                      |           |
| E.                                                                                                                                                  | Showed DEEP SUBJECT-MATTER KNOWLEDGE.                                                               | Superior                        |           |
| F.                                                                                                                                                  | Demonstrated HIGH LEVELS OF REAL-WORLD EXPERIENCE.                                                  | Acceptable                      |           |
| G.                                                                                                                                                  | MOTIVATED ME TO ENGAGE ACTIVELY IN THE LEARNING.                                                    | Acceptable                      |           |
| H.                                                                                                                                                  | Is a person I CAME TO TRUST.                                                                        | Superior                        |           |
| 5. From your perspective, how valuable are the concepts taught in the workshop? HOW MUCH WILL THEY HELP YOU IMPROVE YOUR MEASLES COVERAGE OUTCOMES? |                                                                                                     |                                 |           |
| A.                                                                                                                                                  | Will NOT HELP ME to improve my outcomes.                                                            | Unacceptable                    |           |
| B.                                                                                                                                                  | Will HELP ME SLIGHTLY to improve my work outcomes.                                                  | Unacceptable                    |           |
| C.                                                                                                                                                  | Will HELP ME TO A MODERATE AMOUNT to improve my work outcomes.                                      | Acceptable                      |           |
| D.                                                                                                                                                  | Will HELP ME SIGNIFICANTLY to improve my work outcomes.                                             | Superior                        |           |
| E.                                                                                                                                                  | Concepts taught ARE NOT RELEVANT to my work.                                                        | Red Flag                        |           |

Summary of comments

---

Is there one specific thing you plan to do differently when you return to your workplace?

---

*List responses here*

|  |
|--|
|  |
|  |
|  |
|  |
|  |
|  |
